# Supplementary material
Source: Springer Nature journal article supplement (https://www.springermedizin.de/resource/supplementary/12888_2013_1640_MOESM5_ESM.pdf/9481044)

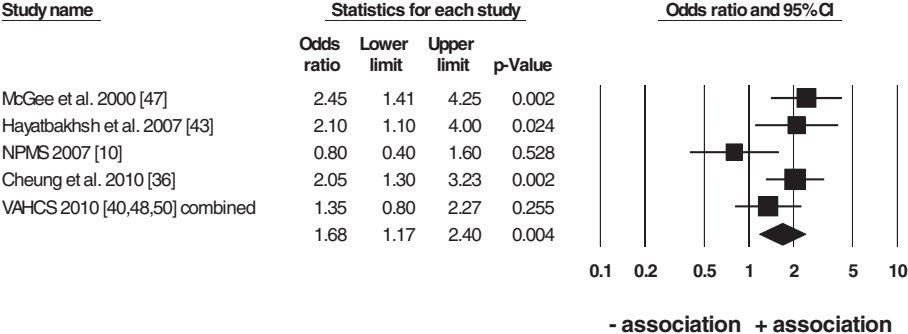

**Funnel Plot of Standard Error by Log odds ratio**

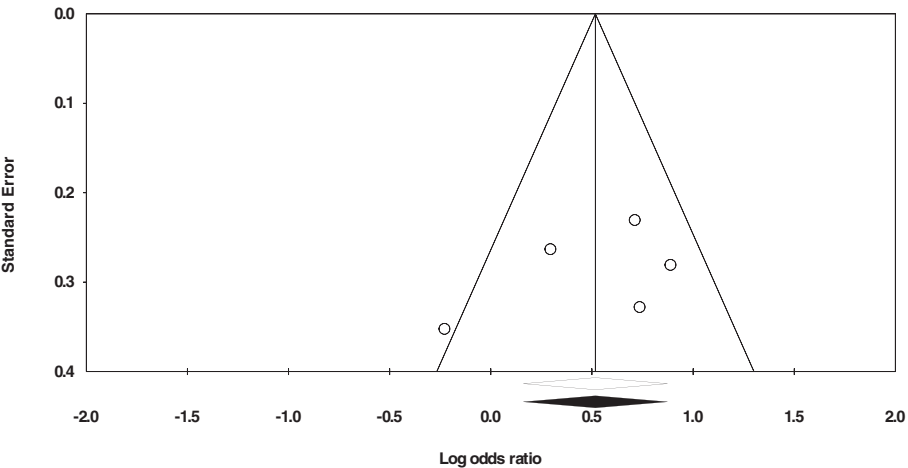

Supplement: MOESM5 [file 9481044]
